# Supplementary material
Source: PubMed Central journal article supplement (PMC5540153)
Supplement: NIHMS870244-supplement-1.pdf [file NIHMS870244-supplement-1.pdf]

**Supplementary Information for Eoh et al.**

**Metabolic anticipation in *Mycobacterium tuberculosis***

Hyungjin Eoh, Zhe Wang, Emilie Layre, Poonam Rath, Roxanne Morris, D. Branch Moody and Kyu Y.

Rhee

This document contains Supplementary Figures 1-8.

A.

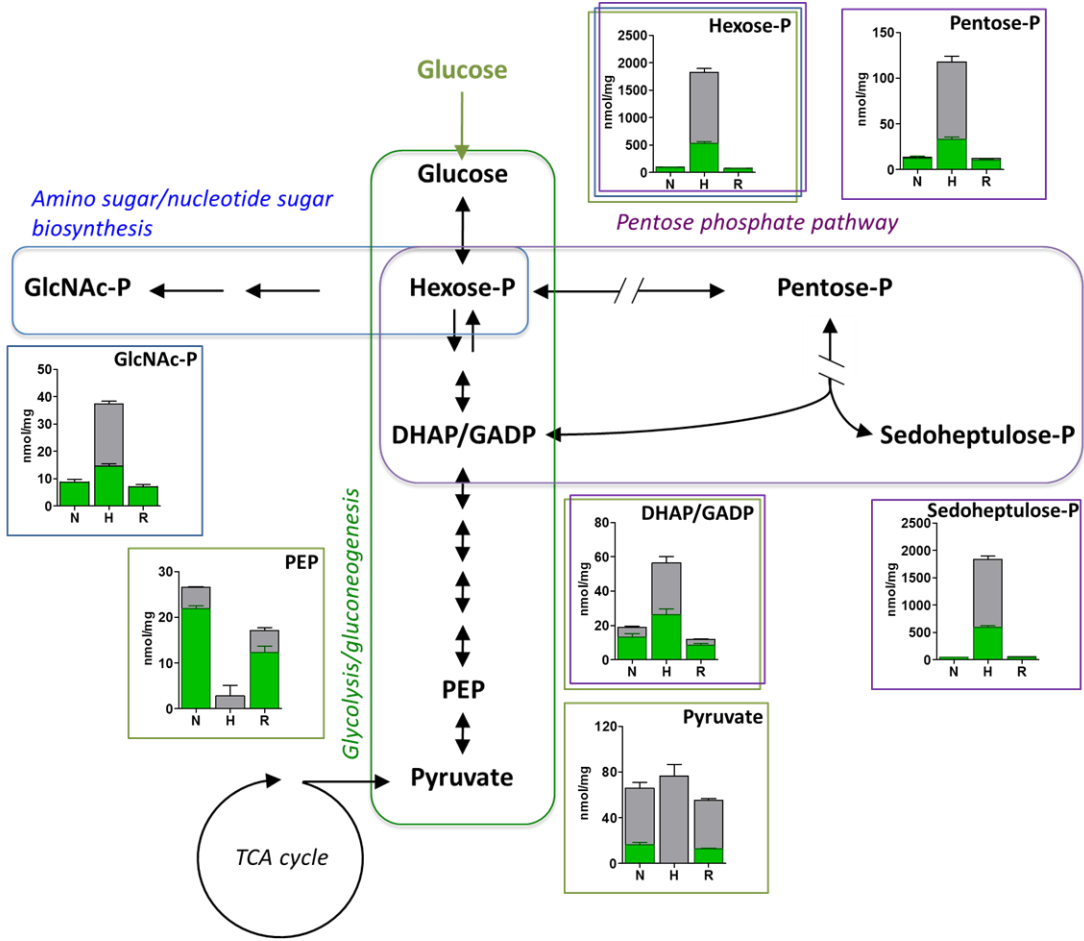

B.

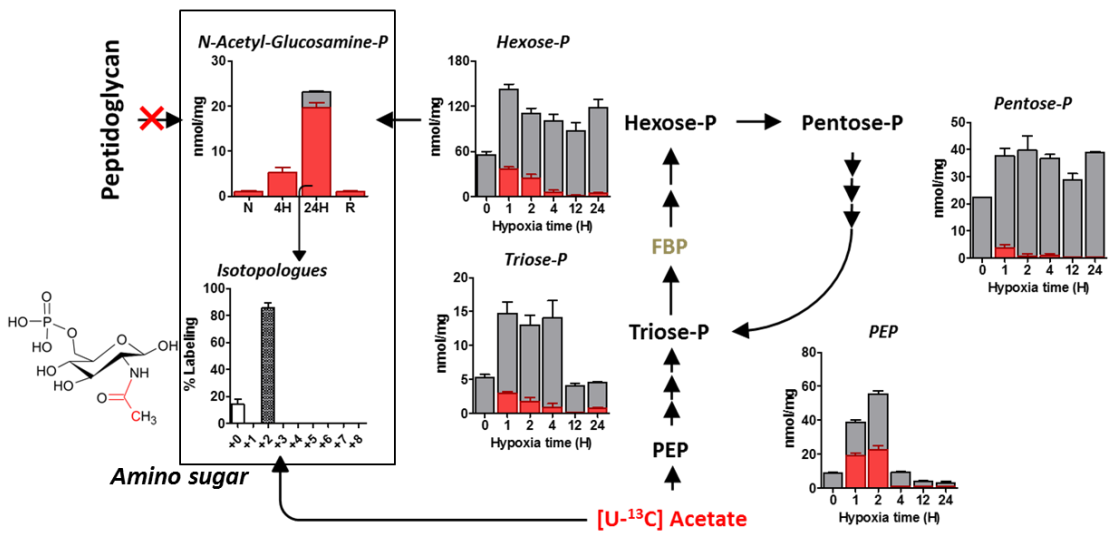

## Supplementary Figure 1

### **A. Hypoxia-induced remodeling of upper glycolysis, amino sugar and nucleotide sugar biosynthesis and pentose phosphate pathways in *M. tuberculosis* in response to 1% O<sub>2</sub>/5% CO<sub>2</sub>.**

Intrabacterial pool sizes (nmol/mg protein) and isotopic labeling of *M. tuberculosis* intermediates in: upper glycolysis (**green box**); amino sugar biosynthesis (**blue box**); and pentose phosphate pathways (**purple box**), incubated in [U-<sup>13</sup>C]glucose-containing media for 24 h at 20% (normoxia; **N**); 4 h (**4H**) or 24 h (**24H**) at 1% O<sub>2</sub> (hypoxia; **H**); and 24 h at 20% O<sub>2</sub> following pre-incubation at 1% O<sub>2</sub>/5% CO<sub>2</sub> for 24 h (re-aerated; **R**). Total bar heights indicate the intrabacterial concentration (nmol/mg protein), whereas the green area of each bar denotes the enrichment of <sup>13</sup>C labeling achieved following transfer to [U-<sup>13</sup>C] glucose-containing m7H10 media under the condition indicated. All values are the average of three biological replicates (n=3) ±SEM and representative of 2 independent experiments. DHAP, dihydroxyacetone phosphate; GADP, glyceraldehyde phosphate; GlcNAc-P, N-acetyl glucosamine phosphate; hexose-P, glucose-6-phosphate and its isomers; pentose-P, ribose-5-phosphate and its isomers; PEP, phosphoenolpyruvate; sedoheptulose-P, sedoheptulose-7-phosphate and its isomers.

**B. Kinetic <sup>13</sup>C isotopic tracing of glycolytic, amino and nucleotide sugar, and pentose phosphate pathway intermediates.** Isotopologue analysis indicates that the observed accumulation of amino sugar (N-acetyl-glucosamine-P) predominantly (~90 %) consists in the M+2 isotopologue, indicative of *de novo* biosynthesis arising from the condensation of exogenous [U-<sup>13</sup>C] acetate and endogenous hexose-P, rather than degradation of pre-existing peptidoglycan.

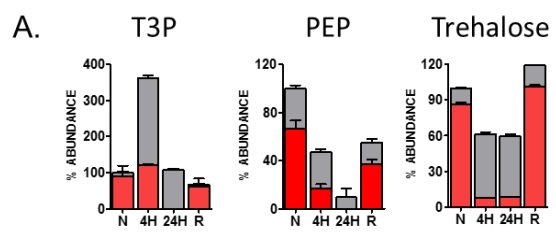

|           | R | 4H   | 24H  |
|-----------|---|------|------|
| Hex-P     | 1 | 5.45 | 5.85 |
| Pent-P    | 1 | 3.22 | 4.78 |
| S7P       | 1 | 6.58 | 9.54 |
| T3P       | 1 | 3.62 | 1    |
| PEP       | 1 | 0.46 | 0.09 |
| Trehalose | 1 | 0.6  | 0.57 |

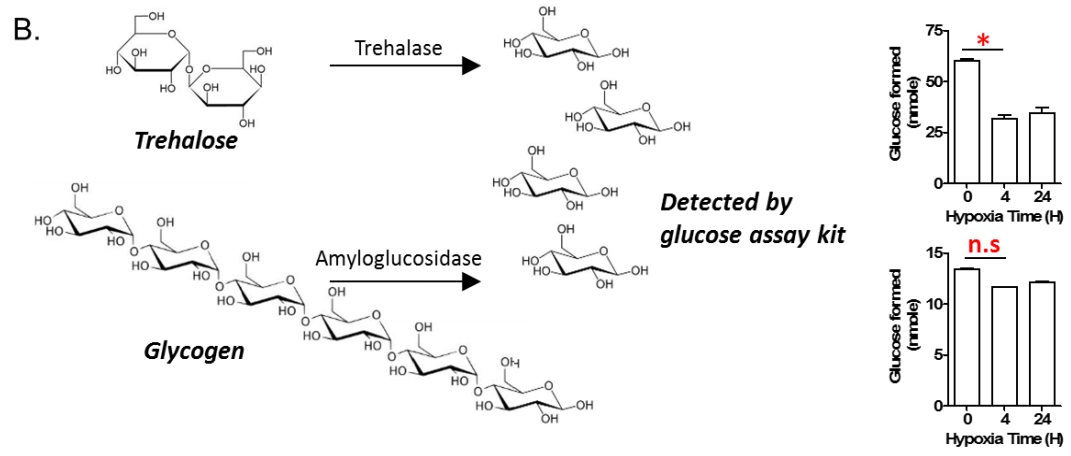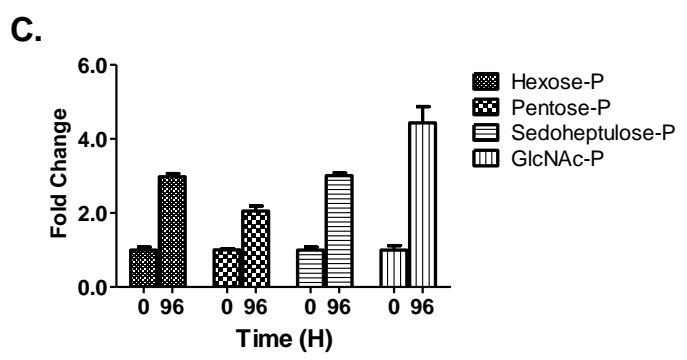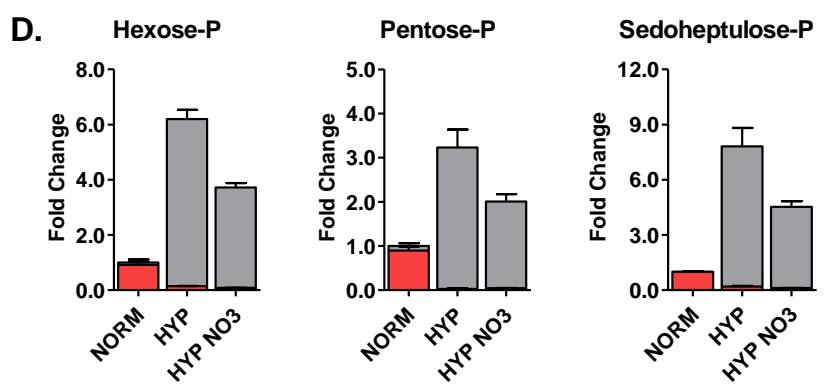

## Supplementary Figure 2

**A. Metabolic pool sizes of downstream glycolytic intermediates, T3P and PEP and an upstream intermediate, trehalose following 4 (4H) or 24 h (24H) 1% O<sub>2</sub>/5%CO<sub>2</sub> and 24h at 20% O<sub>2</sub> following pre-incubation at 1% O<sub>2</sub>/5%CO<sub>2</sub> for 24h (R).** Total bar heights indicate the overall intrabacterial concentration (relative to that of normoxic Mtb), whereas the red colored area of each bar denotes the enrichment of <sup>13</sup>C labeling achieved following transfer to [U-<sup>13</sup>C] acetate-containing m7H10 media under the condition indicated. Table in right panel shows the fold changes of intermediates in glycolytic and pentose phosphate pathways at 4 (4H) and 24 h (24H) hypoxia condition relative to those of normoxic Mtb counterparts. T3P, triose 3-phosphate (glyceraldehyde 3-phosphate and dihydroxyacetone phosphate).

**B. Intrabacterial trehalose or glycogen concentration of *M. tuberculosis* in ambient air (0H) or 1% O<sub>2</sub> for 4 (4H) and 24 h (24H)** as determined by “glucose assay kit.” This kit consists in a coupled enzyme system using trehalase and amyloglucosidase. Production of glucose is quantitatively proportional to intrabacterial amount of trehalose and glycogen, respectively. The kit ultimately yields a colored final product that can be measured at 540 nm and is proportional to the glucose produced by the coupled enzymes. Intrabacterial trehalose concentration, but not glycogen, was diminished in *M. tuberculosis* under 1% O<sub>2</sub> vs ambient air. Shown values are expressed relative to those observed in normoxic Mtb, which was set to a reference value of 1. \*, p≤0.005; and n.s, not significant by Student’s unpaired t-test.

**C. Metabolic alterations in upper glycolytic and pentose phosphate pathways following 96 hours (4 days) of incubation under hypoxia (1% O<sub>2</sub>/5% CO<sub>2</sub>).** Shown values are expressed relative to those observed in normoxic Mtb, which was set to a reference value of 1.

**D. Metabolic alterations in upper glycolytic and pentose phosphate pathways in the presence of nitrate, an alternate terminal electron acceptor capable of supporting TCA cycle activity at 1% O<sub>2</sub>/5% CO<sub>2</sub>.** Shown values are expressed relative to those observed in normoxic Mtb, which was set to a reference value of 1.

A.?

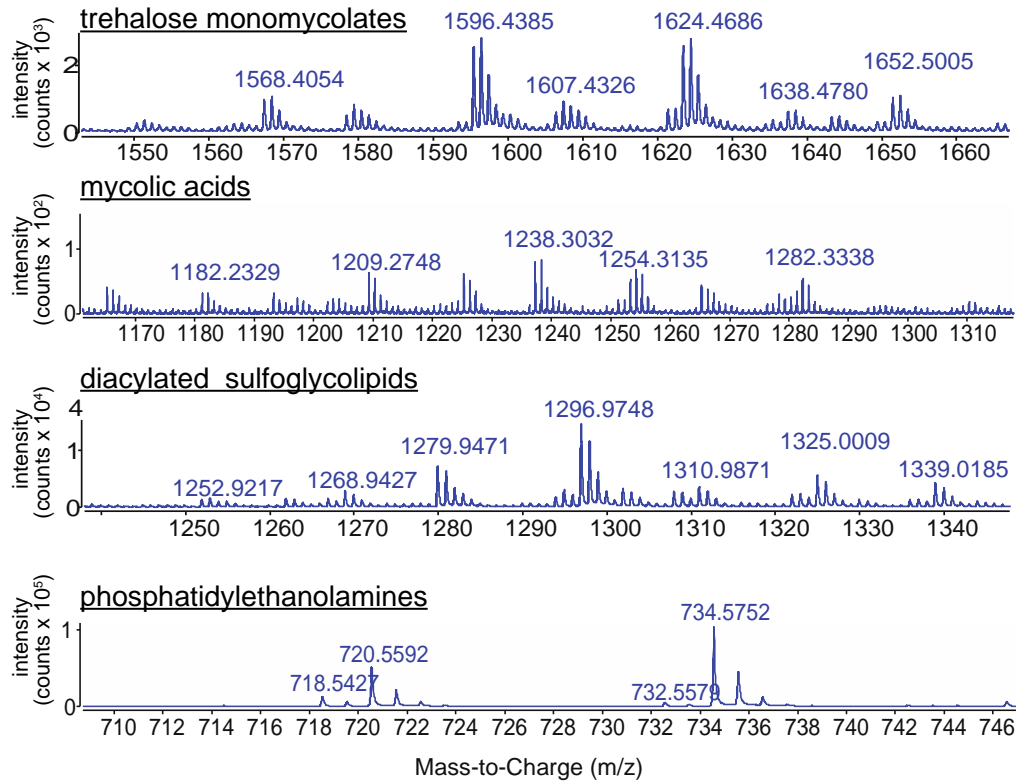

B.

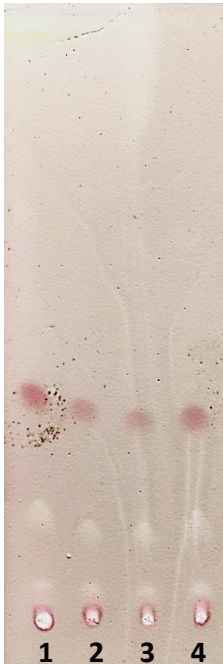

1. *M. tuberculosis* under replicating (20% O<sub>2</sub>).
2. Nonreplicating *M. tuberculosis* exposed to 1% O<sub>2</sub> for 4 hr.
3. Nonreplicating *M. tuberculosis* exposed to 1% O<sub>2</sub> for 24 hr.
4. Reaerated *M. tuberculosis* for 24 hr after exposure to 1% O<sub>2</sub> for 24 hr.

### Supplementary Figure 3

#### Hypoxia induced depletion of TDM content in *M. tuberculosis*.

**A.** Extracted ion chromatograms of *M. tuberculosis* phosphatidylethanolamine, free mycolic acid, trehalose dimycolate, and diacylated sulfoglycolipid isolated from replicating Mtb.

**B.** Analysis of the extractable TDM from *M. tuberculosis* incubated for 24 hr at 20% O<sub>2</sub> (1); 4 h at 1% O<sub>2</sub> (2); 24 h at 1% O<sub>2</sub> (3); and 24 hr at 20% O<sub>2</sub> following re-aeration of *M. tuberculosis* pre-incubated at 1% O<sub>2</sub> for 24 hr (4). Equal amounts of total cellular lipids were run in the solvent system (chloroform:methanol:water; 20:4:0.5; v/v/v). The TLC plate was sprayed with  $\alpha$ -naphthol to specifically reveal glycolipids. Pink-stained compounds correspond to glycolipids; whitish-stained compounds migrating close to the origin are phospholipids. The labeled band shown in the TLC correspond to the R<sub>f</sub> of a TDM standard.

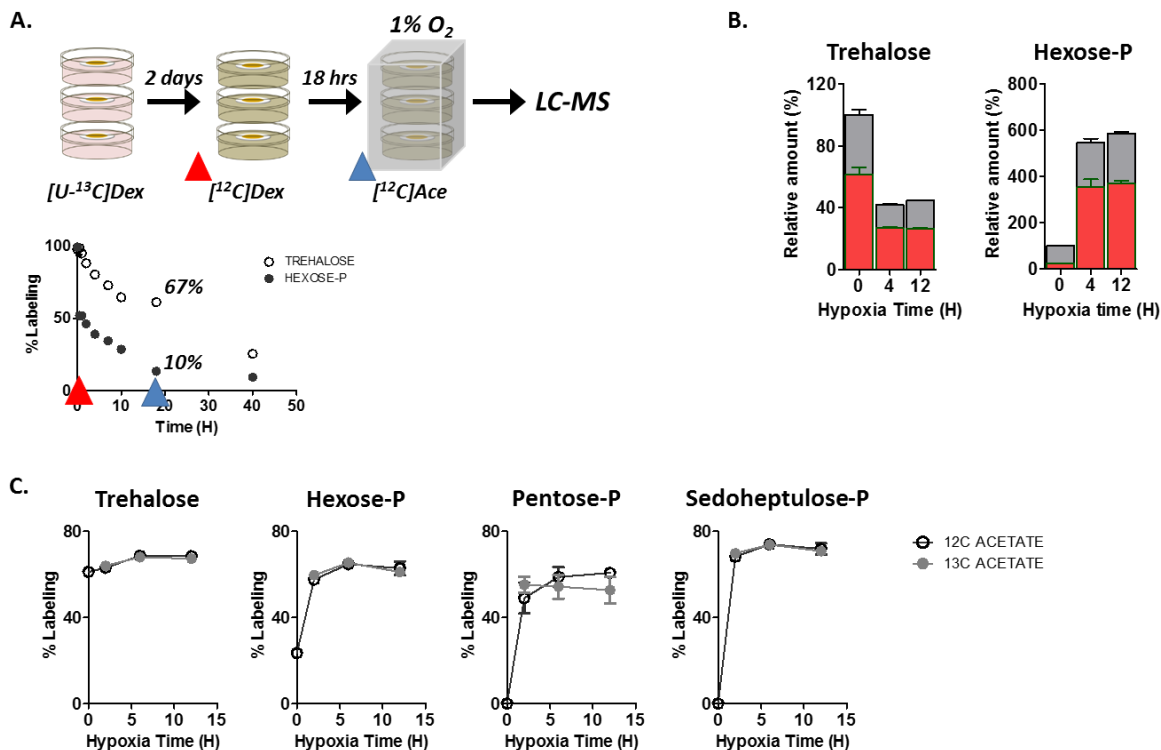

## Supplementary Figure 4

### Pulse-chase labeling of *M. tuberculosis* cell envelope reveals hypoxia-induced catabolism of TMM into intermediates of upper glycolysis, pentose phosphate pathway, and aminosugar biosynthesis.

**A.** Top, schematic diagram illustrating the labeling strategy used to selectively pre-label cell envelope TMM and follow the metabolic fate of labeled trehalose and hexose phosphate following exposure to  $1\% O_2/5\%CO_2$ . Bottom, Time course plot demonstrating the extent of remaining  $^{13}C$  labeling in free hexose phosphate and trehalose pools following 48h incubation in  $[U-^{13}C]$  glucose, followed by 18 h of isotopic washout in unlabeled glucose. Shown values indicate % of total metabolite pools that consist in  $^{13}C$  labeled species. Red and blue arrows indicate time points when the metabolic enrichment was measured.

**B.** Time course plot demonstrating the extent of labeling observed in free hexose phosphate and trehalose pools during incubation in  $1\% O_2/5\%CO_2$  for either 4 or 12 h after 48 h of incubation in  $[U-^{13}C]$  glucose, followed by 18 h of isotopic washout in unlabeled glucose. Shown values are expressed relative to those observed in normoxic Mtb, whose total pool sizes were set to a reference value of 100%.

**C.** Time course plot of  $^{13}C$  enrichment of trehalose, hexose phosphate, pentose phosphate, and sedoheptulose phosphate following exposure to  $1\% O_2/5\%CO_2$  in the presence of unlabeled (open circle) or  $[U-^{13}C]$  (closed circle) acetate. Shown values indicate % of total metabolite pools that consist in  $^{13}C$  labeled species. All values are means  $\pm$  SEM of biological replicates (n=3) and representative of 2 independent experiments.



A.

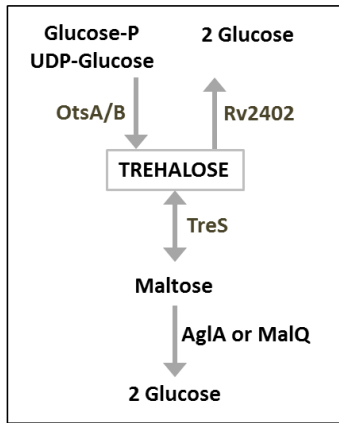

B.

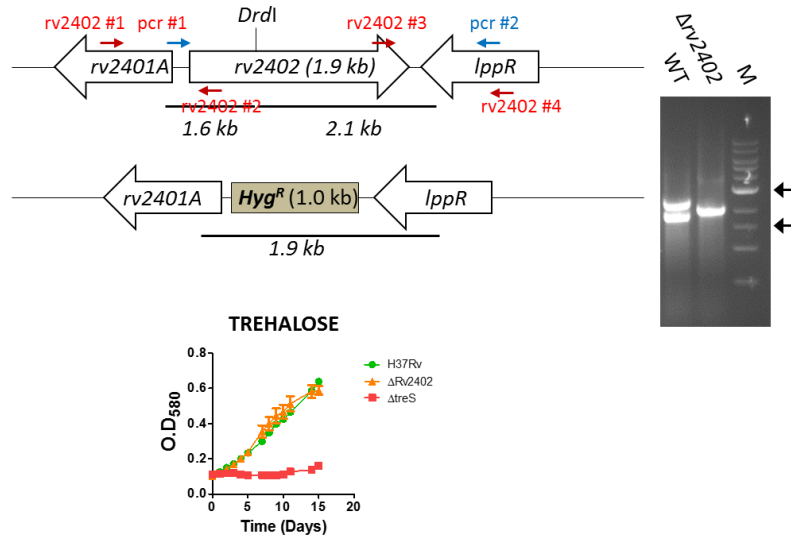

C.

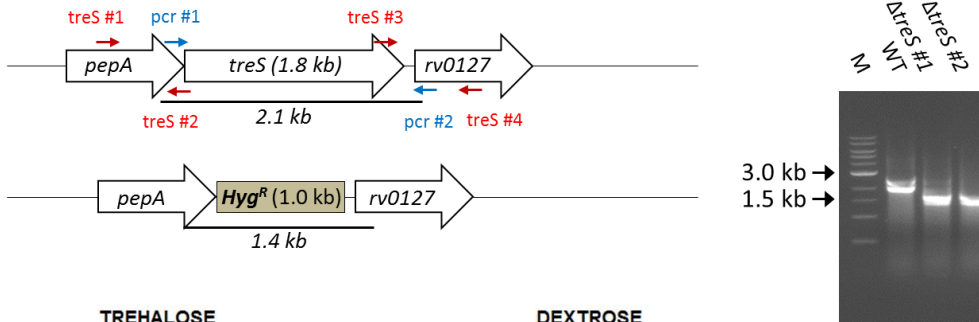

D.

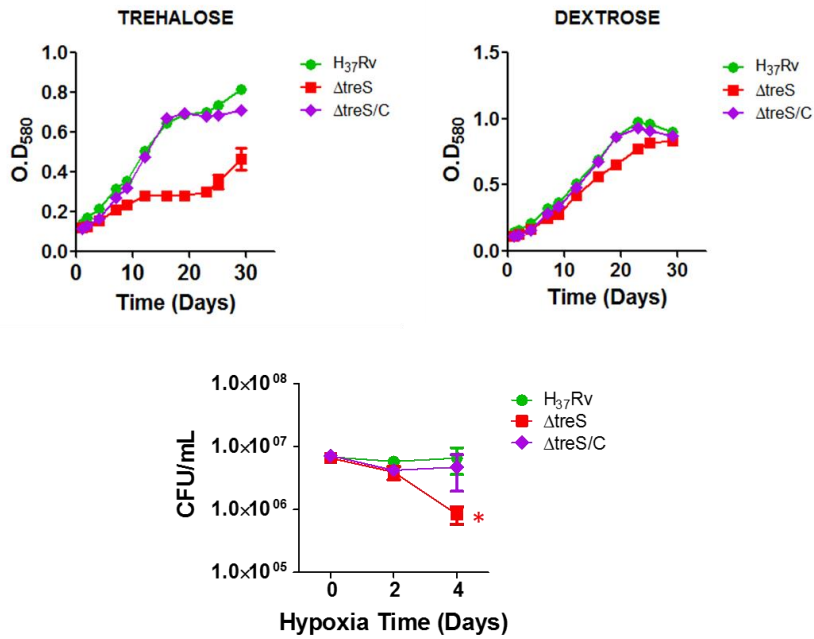

## Supplementary Figure 5

**A. Schematic diagram of annotated genes and enzymes involved in trehalose catabolism and biosynthesis in *M. tuberculosis*.**

**B. Generation of  $\Delta rv2402$ .** Strategy for deleting *rv2402* by homologous recombination and validation of  $\Delta rv2402$  candidate by PCR using newly designed primer set (pcr #1 and pcr #2). PCR products were digested with *DrdI* and were at expected sizes. Growth curve indicated that  $\Delta rv2402$  showed comparable growth to that of H37Rv wild type in m7H9 containing trehalose as a single carbon source.

**C. Generation of  $\Delta treS$ .** Strategy for deleting *treS* (*rv0126*) by homologous recombination and validation of 2 independent  $\Delta treS$  candidates by PCR using newly designed primer set (pcr #1 and pcr #2). PCR products were at expected sizes. Primer sequences used to generate and confirm indicates constructs are provided in Methods section.

**D. Growth patterns (top right and left panels) and survival (bottom panel; recorded as CFU/ml) of wild type (H37Rv), *treS*-deficient ( $\Delta treS$ ) and complemented ( $\Delta treS/C$ ) *M. tuberculosis* in media containing either trehalose (left) or dextrose (right) as single carbon sources; and following incubation 1% O<sub>2</sub>. \*p < 0.005 by ANOVA with Bonferroni post-test correction. CFU= colony forming units. Primer sequences used to generate and confirm indicates constructs are described in Methods section**

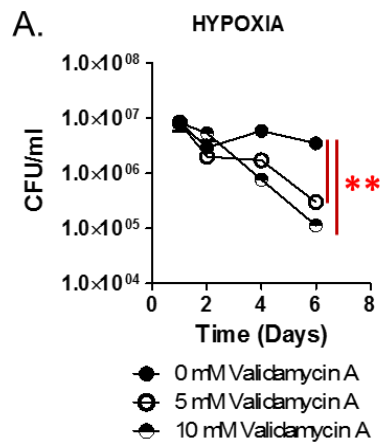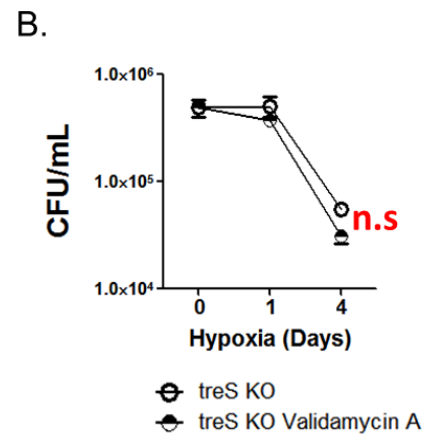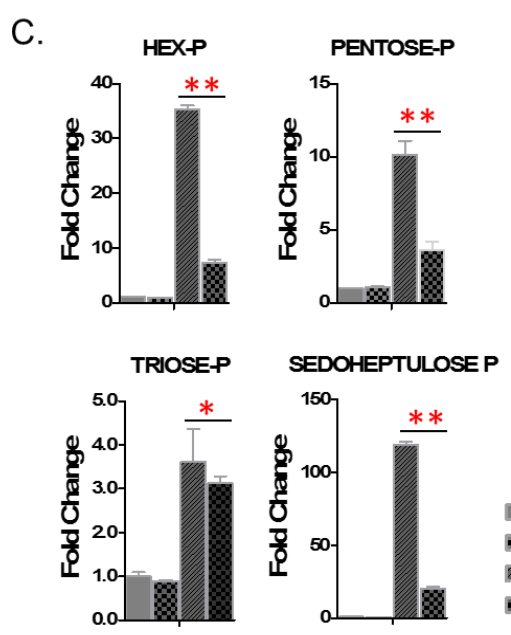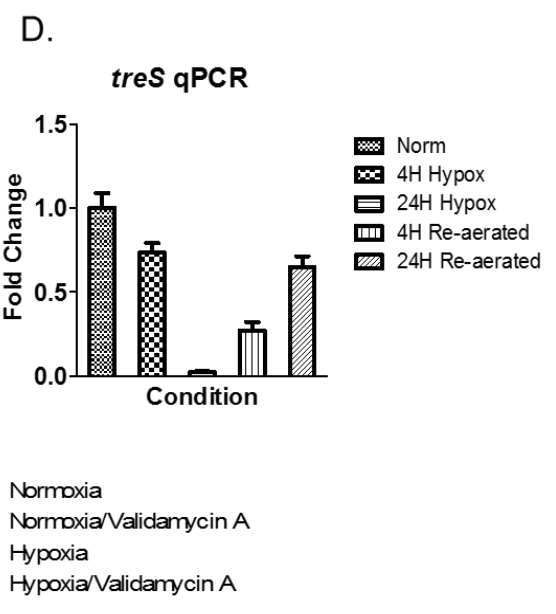

## Supplementary Figure 6

### Chemical validation of TreS essentiality in response to hypoxia using the specific inhibitor validamycin A.

**A.** Viability of WT *M. tuberculosis* following treatment with validamycin A during adaptation to hypoxia vs. vehicle control. All values are means  $\pm$  SEM of 3 biological replicates (n=3) and representative of 2 independent experiments. \*\*p $\leq$ 0.005 by 2-way ANOVA with Bonferroni post-test.

**B.** Viability of  $\Delta treS$  *M. tuberculosis* following treatment with validamycin A during adaptation to hypoxia vs. vehicle control. All values are means  $\pm$  SEM of 3 biological replicates (n=3) and representative of 2 independent experiments. n.s, not significant by Student's unpaired t-test.

**C.** Metabolic profiles of Mtb treated with the TreS inhibitor validamycin A under normoxia or hypoxia. Shown values are expressed relative to those observed in normoxic Mtb, which was set to a reference value of 1. All values are means  $\pm$  SEM of 3 biological replicates (n=3) and representative of 2 independent experiments. \*p $\leq$ 0.05, \*\*p $\leq$ 0.005 by Student's unpaired t-test.

**D.** Relative changes of *treS* mRNA transcript under varying metabolic states including normal replicating (Norm), 4h (4H Hypox) or 24h (24H Hypox) hypoxia, and 4h (4H Re-aerated) or 24h (24H Re-aerated) reaeration after 24h hypoxia. Shown values are expressed relative to those observed in normoxic Mtb, which was set to a reference value of 1. All values are means  $\pm$  SEM of 3 biological replicates (n=3) and representative of 2 independent experiments.

**A.**

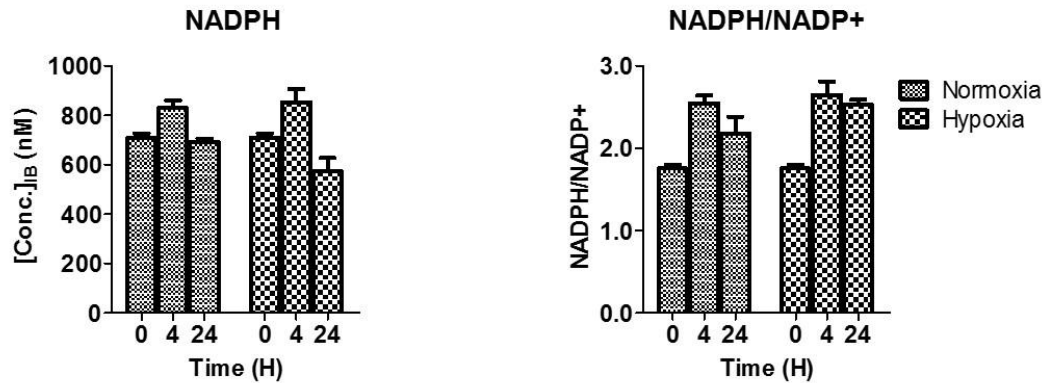

**B.**

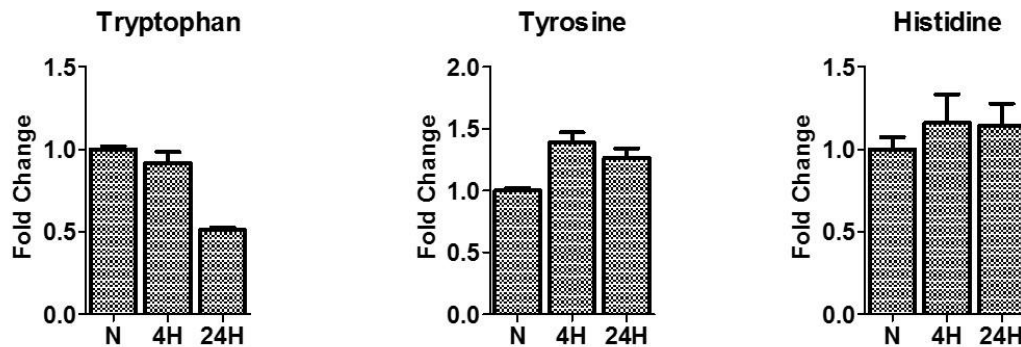

### Supplementary Figure 7

#### Metabolic consequences of hypoxia-induced increase in pentose phosphate pathway intermediates.

**A.** Intrabacterial levels in NADPH and NADPH/NADP+ ratio were detected by LC-MS metabolomics. No statistically significant changes greater than 2-fold ( $p < 0.05$  by Student's unpaired t-test) were detected.

**B.** Relative pool size changes of four aromatic amino acids such as phenylalanine, tryptophan, tyrosine, and histidine were calculated. N= normoxia; 4H= 4 h incubation at 1%  $O_2/5\%CO_2$ ; 24H= 24 h incubation at 1%  $O_2/5\%CO_2$ . Shown values are expressed relative to those observed in normoxic Mtb, which was set to a reference value of 1. All values were the average of 3 biological replicates  $\pm$ SEM and representative of 2 independent experiments. No statistically significant changes greater than 2-fold ( $p < 0.05$  by Student's unpaired t-test) were detected.

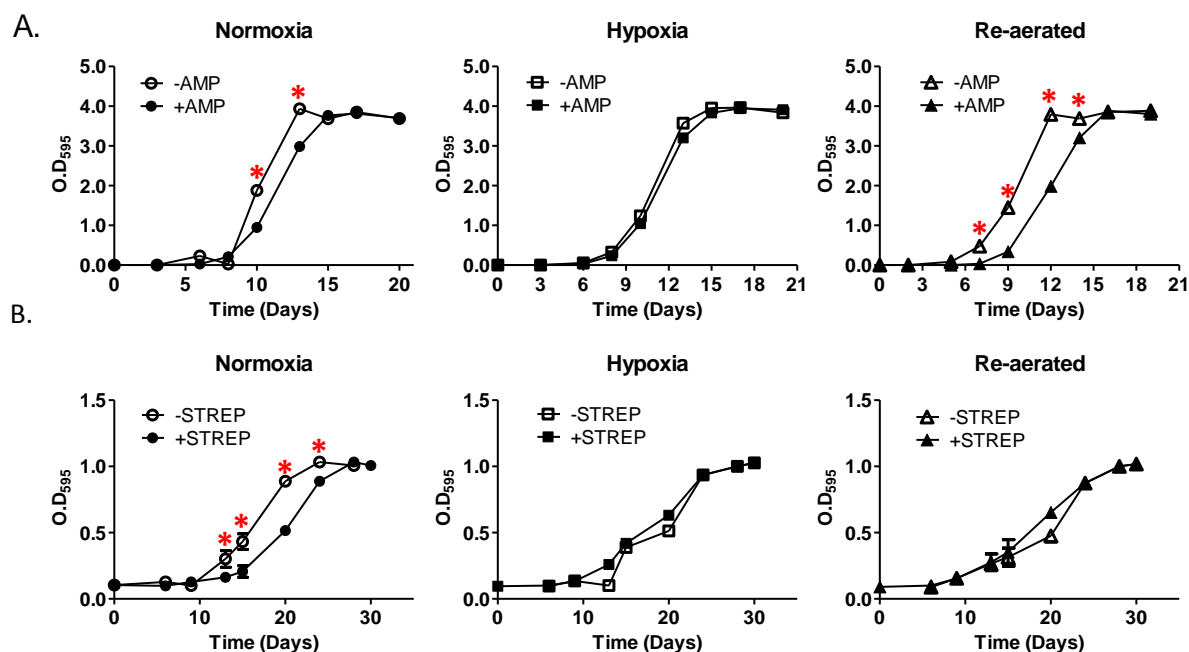

## Supplementary Figure 8

### Metabolic state dependent sensitivity of *M. tuberculosis* against a peptidoglycan inhibitor, ampicillin.

**A.** Growth curves of *M. tuberculosis* incubated in ambient air and during re-aeration following 24h challenge with the covalent peptidoglycan biosynthesis inhibitor, ampicillin, at 8X MIC (100 ug/ml) and 1:100 subculture into antibiotic-free media.

**B.** Growth curves of *M. tuberculosis* in different metabolic states were also monitored in the presence of 2X MIC (1.25  $\mu$ g/ml) streptomycin (STREP), a protein synthesis inhibitor, to show the functional specificity of hypoxia induced intermediates in *de novo* peptidoglycan biosynthesis during reactivation.

All values are the average of three biological replicates  $\pm$  SEM and representative of two independent experiments. \* $p \leq 0.05$  between antibiotic-treated (+AMP or +STREP) and vehicle control (-AMP or -STREP) by Student's unpaired t-test.
